# Supplementary material for: 3D Fe3O4@Au@Ag nanoflowers assembled magnetoplasmonic chains for in situ SERS monitoring of plasmon-assisted catalytic reactions
Source: Royal Society of Chemistry journal article supplement (doi:10.1039/c6ta02264b), 2016-01-01
Supplement: c6ta02264b1.pdf [file c6ta02264b1.pdf]

## *Supporting Information*

### **3D Fe<sub>3</sub>O<sub>4</sub>@Au@Ag Nanoflowers Assembled Magnetoplasmonic Chains for in situ SERS Monitoring of Plasmon-assisted Catalytic Reaction**

Qianqian Ding<sup>a,b</sup>, Hongjian Zhou<sup>a,\*</sup>, Haimin Zhang<sup>a</sup>, Yunxia Zhang<sup>a</sup>, Guozhong Wang<sup>a</sup>, Huijun Zhao<sup>a,c,\*</sup>

<sup>a</sup> Key Laboratory of Materials Physics, Centre for Environmental and Energy Nanomaterials, Anhui Key Laboratory of Nanomaterials and Nanotechnology, Institute of Solid State Physics, Chinese Academy of Sciences, Hefei 230031, P.R. China

<sup>b</sup> Department of Materials Science and Engineering, University of Science and Technology of China, Hefei 230026, P. R. China

<sup>c</sup> Centre for Clean Environment and Energy, Gold Coast Campus, Griffith University, QLD 4222, Australia

\*Corresponding author: [hjzhou@issp.ac.cn](mailto:hjzhou@issp.ac.cn) (H. Zhou); [h.zhao@griffith.edu.au](mailto:h.zhao@griffith.edu.au) (H. Zhao); Tel: 0086-55165591441; Fax: 0086-55165591434.

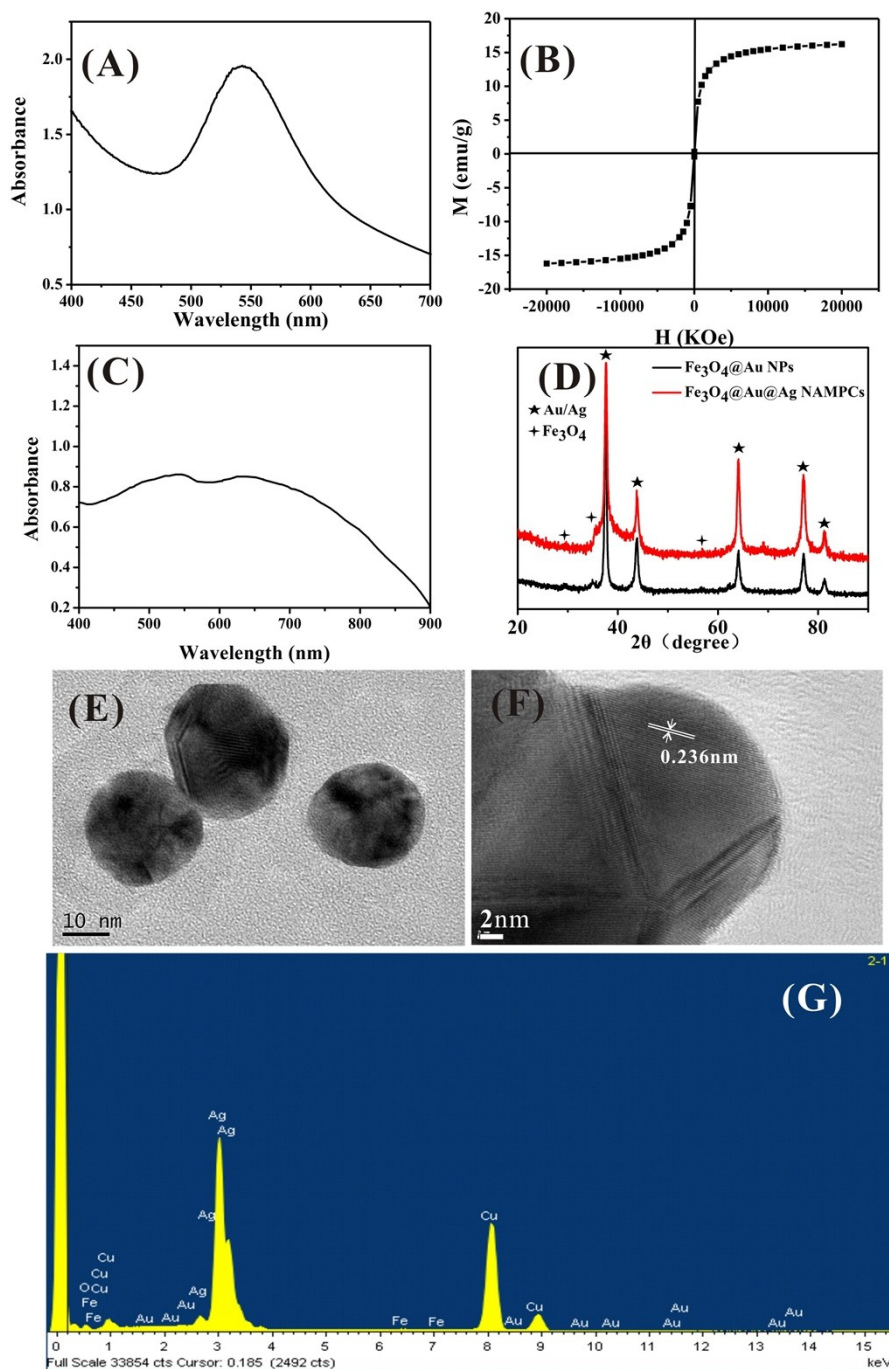

Fig. S1 (A) UV-Vis spectrum of  $\text{Fe}_3\text{O}_4@Au$  NPs; (B) magnetization curve of  $\text{Fe}_3\text{O}_4@Au$  NPs at room temperature; (C) UV-Vis spectrum of  $\text{Fe}_3\text{O}_4@Au@Ag$  NAMPCs; (D) XRD patterns of as-prepared  $\text{Fe}_3\text{O}_4@Au$  NPs and  $\text{Fe}_3\text{O}_4@Au@Ag$  NAMPCs; the TEM image (E) and HRTEM image (F) of  $\text{Fe}_3\text{O}_4@Au$  NPs; (G) EDAX spectrum of the  $\text{Fe}_3\text{O}_4@Au@Ag$  NAMPCs.

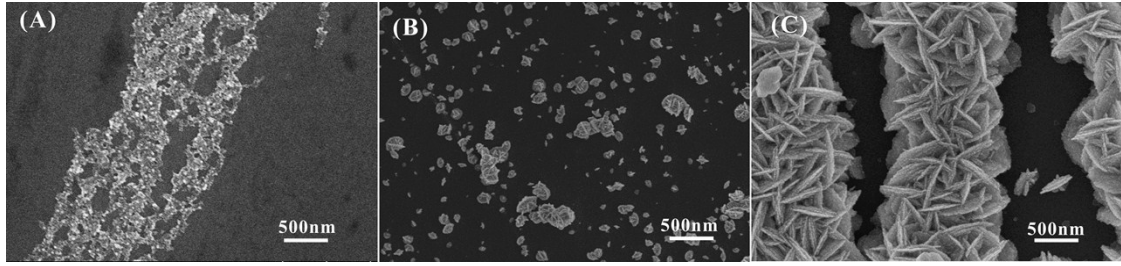

Fig. S2 SEM images of (A) MPNCs, (B) irregular  $\text{Fe}_3\text{O}_4@Au-Ag$  nanoparticles and (C) the  $\text{Fe}_3\text{O}_4@Au@Ag$  NAMPCs.

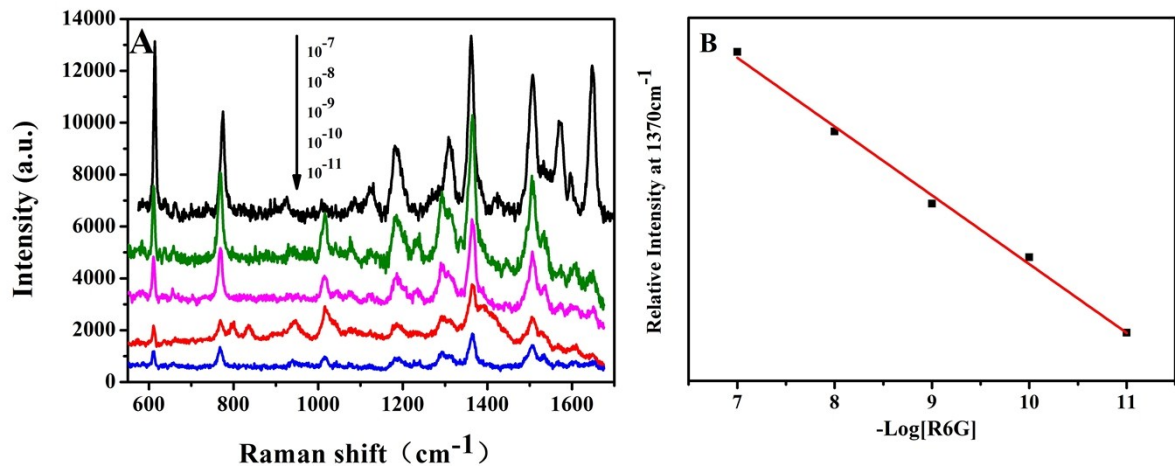

Fig. S3 (A) SERS spectra for the  $\text{Fe}_3\text{O}_4@Au@Ag$  NAMPCs probed with the various concentrations of R6G; B) Logarithmic plot of  $[R6G]$  versus SERS intensity together with linear fitting.

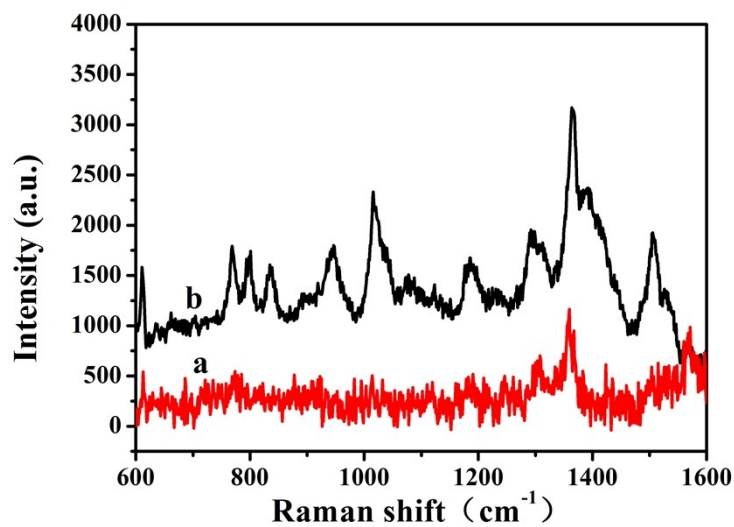

Fig. S4 Raman spectrum of 0.1M R6G (curve a) and SERS spectra of  $10^{-10}$ M R6G (curve b) obtained from assembled  $\text{Fe}_3\text{O}_4@Au@Ag$  NAMPCs.

Table S1 Reported ensemble averaged enhancement factors (EF) of SERS substrates

| SERS substrate                               | Molecule       | EF                   | Reference                       |
|----------------------------------------------|----------------|----------------------|---------------------------------|
| $\alpha$ -Fe <sub>2</sub> O <sub>3</sub> @Au | 4-ATP          | $3.1 \times 10^4$    | Tang et al. <sup>1</sup>        |
| Dimer-on-mirror                              | BPE            | $2.2 \times 10^{11}$ | Hakonen et al. <sup>2</sup>     |
| Ag Cube Film                                 | R6G            | $10^{11}$            | Lee et al. <sup>3</sup>         |
| Ag Clusters                                  | CV             | $1.6 \times 10^9$    | Chakraborty et al. <sup>4</sup> |
| CNT @Ag array                                | R6G            | $10^{10}$            | Zhang et al. <sup>5</sup>       |
| gold nanorod@SiO <sub>2</sub>                | Methylene blue | $3 \times 10^{10}$   | Seo et al. <sup>6</sup>         |
| Ni@Ag                                        | R6G            | $1.525 \times 10^6$  | Ding et al. <sup>7</sup>        |
| Fe <sub>3</sub> O <sub>4</sub> @Au nanorod   | 4-ATP          | $2.13 \times 10^5$   | Tang et al. <sup>8</sup>        |
| Fe <sub>3</sub> O <sub>4</sub> @Au@Ag NAMPCs | R6G            | $2.2 \times 10^9$    | Present study                   |

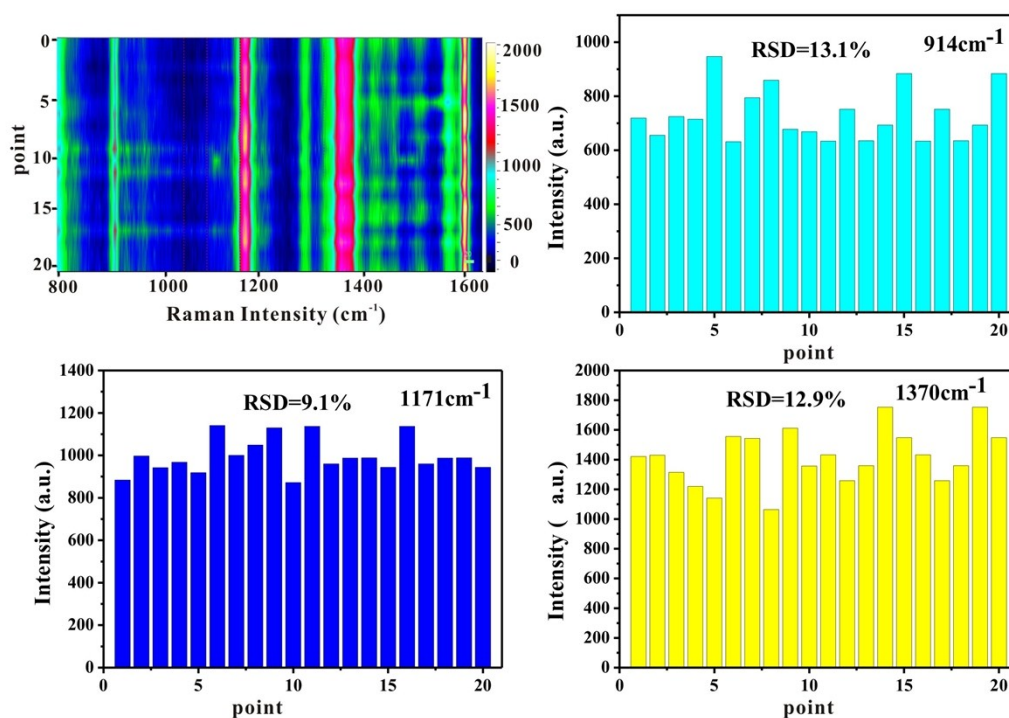

Fig. S5 Series of SERS spectra of CV molecules and its intensities of the main Raman vibrations collected from 20 different batches of Fe<sub>3</sub>O<sub>4</sub>@Au@Ag NAMPCs.

### Notes and references

1. X. H. Tang, W. Y. Cai, L. B. Yang and J. H. Liu, *Nanoscale*, 2013, 5, 11193-11199.
2. A. Hakonen, M. Svedendahl, R. Ogier, Z. J. Yang, K. Lodewijks, R. Verre, T. Shegai, P. O. Andersson and M. Kall, *Nanoscale*, 2015, 7, 9405-9410.
3. H. K. Lee, Y. H. Lee, Q. Zhang, I. Y. Phang, J. M. R. Tan, Y. Cui and X. Y. Ling, *ACS Appl. Mater. Interfaces*, 2013, 5, 11409-11418.
4. I. Chakraborty, S. Bag, U. Landman and T. Pradeep, *J. Phys. Chem. Lett.*, 2013, 4, 2769-2773
5. J. Zhang, X. Zhang, C. Lai, H. Zhou and Y. Zhu, *Opt. Express*, 2014, 22, 21157-21166.

6. S. H. Seo, B. M. Kim, A. Joe, H. W. Han, X. Y. Chen, Z. Cheng and E. S. Jang, *Biomaterials*, 2014, 35, 3309–3318.

7. Q. Q. Ding, H.L.Liu, L. B. Yang and J. H. Liu, *J Mater Chem*, 2012, 22, 19932-19939.

8. X. H. Tang, R. L. Dong, L. B. Yang and J. H. Liu, *J Raman Spectrosc.*2015,46,470-475
